# Supplementary material
Source: publisher site journal article supplement (https://www.dovepress.com/article/295388)
Supplement: Supplementary file 1 [file get_supplementary_file.php]

# ECONOMIC BURDEN OF COPD BY DISEASE SEVERITY – A NATIONWIDE COHORT STUDY IN DENMARK

Anders Løkke, Peter Lange, Jesper Lykkegaard, Rikke Ibsen, Maria Andersson, Sofie de Fine Licht, Ole Hilberg

## SUPPLEMENT

**Supplementary Table 1.** Categorization of GOLD groups

| GOLD group | MRC | Baseline exacerbation    |
|------------|-----|--------------------------|
| A          | 1-2 | 0-1 moderate             |
| B          | ≥3  | 0-1 moderate             |
| C          | 1-2 | ≥2 moderate or ≥1 severe |
| D          | ≥3  | ≥2 moderate or ≥1 severe |

**Supplementary Figure 1.** Study design

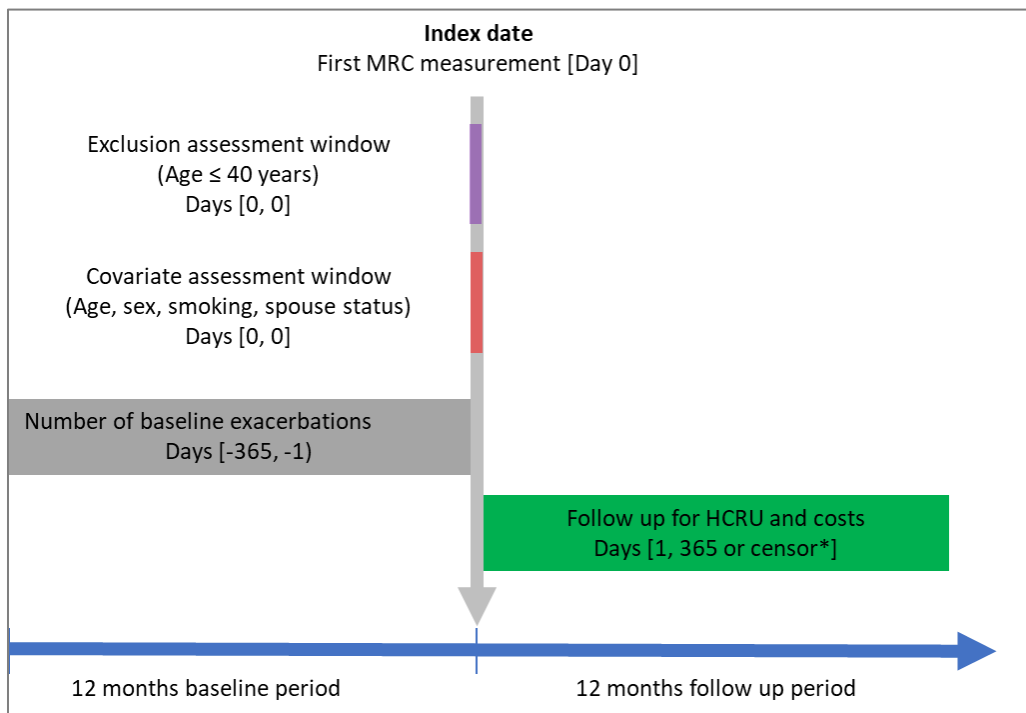

\*Censoring at death, emigration or end of study December 31, 2017
